# Supplementary material for: Toward nanostructured thermoelectrics: synthesis and characterization of lead telluride gels and aerogels
Source: Royal Society of Chemistry journal article supplement (doi:10.1039/c1jm11015b), 2011-01-01
Supplement: c1jm11015b.pdf [file c1jm11015b.pdf]

Electronic Supplementary Information

**Toward Nanostructured Thermoelectrics: Synthesis and Characterization of Lead  
Telluride Gels and Aerogels<sup>†</sup>**

Shreyashi Ganguly and Stephanie L. Brock\*

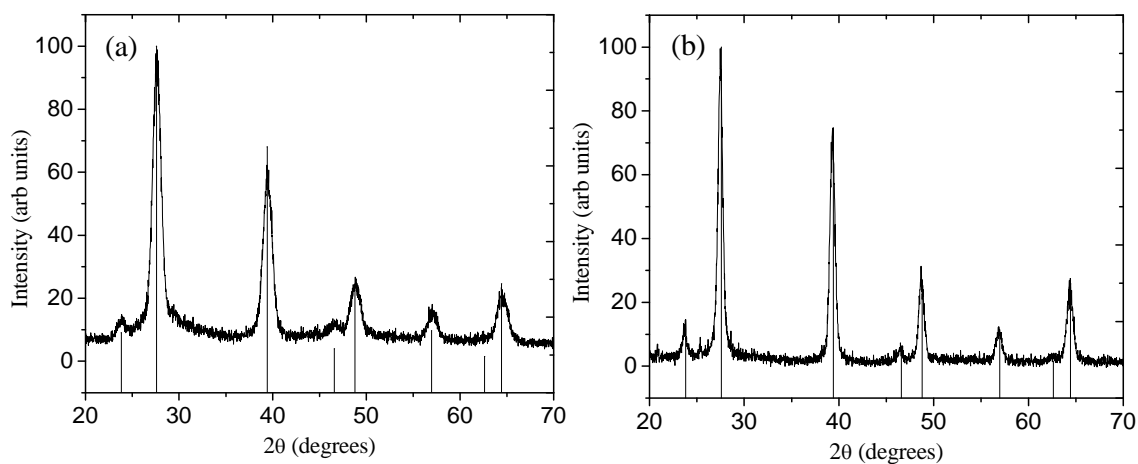

**Fig. S1.** PXRD of PbTe nanoparticles obtained after a growth time of (a) 3 min and (b) 5 min. The vertical lines correspond to the ICDD-PDF # 38-1435 of cubic PbTe.

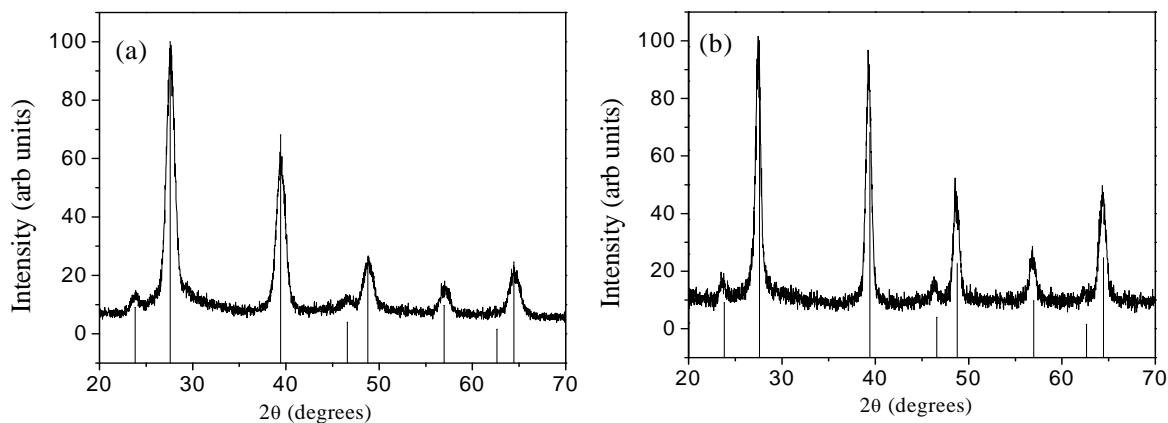

**Fig. S2.** PXRD of PbTe thiolate capped nanoparticles obtained from ligand exchange of nanoparticles prepared using a growth time of (a) 3 min and (b) 5 min. The vertical lines correspond to the ICDD-PDF # 38-1435 of cubic PbTe.

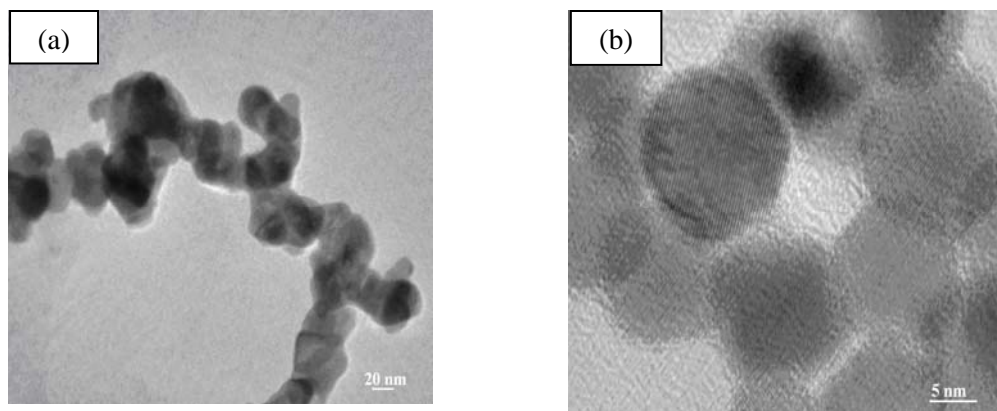

**Fig. S3.** TEM images of thiolate-capped nanoparticles obtained from (a) spherical and (b) cube-shaped PbTe oleate capped nanoparticles.

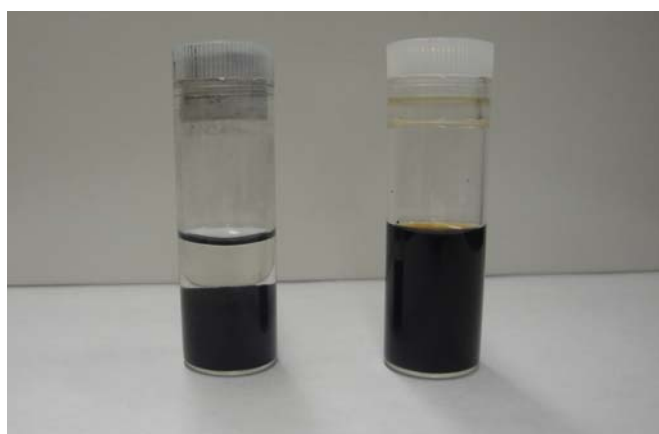

**Fig. S4.** Photograph of initial sol of PbTe (right) and the wet gel formed after addition of TNM (left).

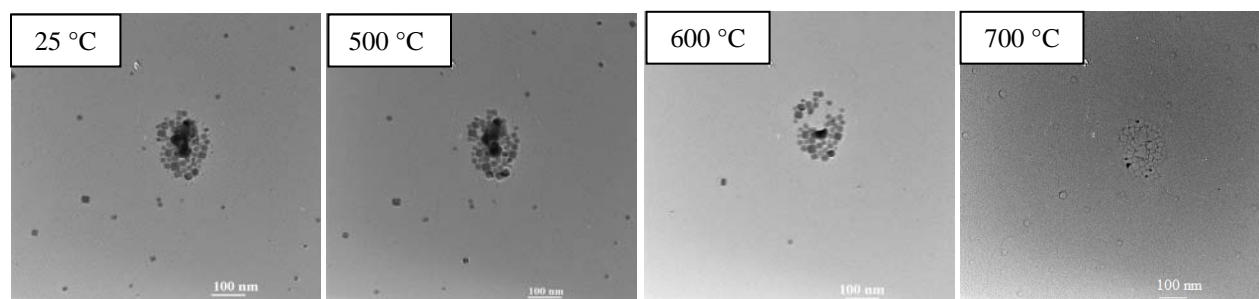

**Fig. S5:** TEM images of PbTe nanoparticles (size = 20 nm) obtained upon heating.

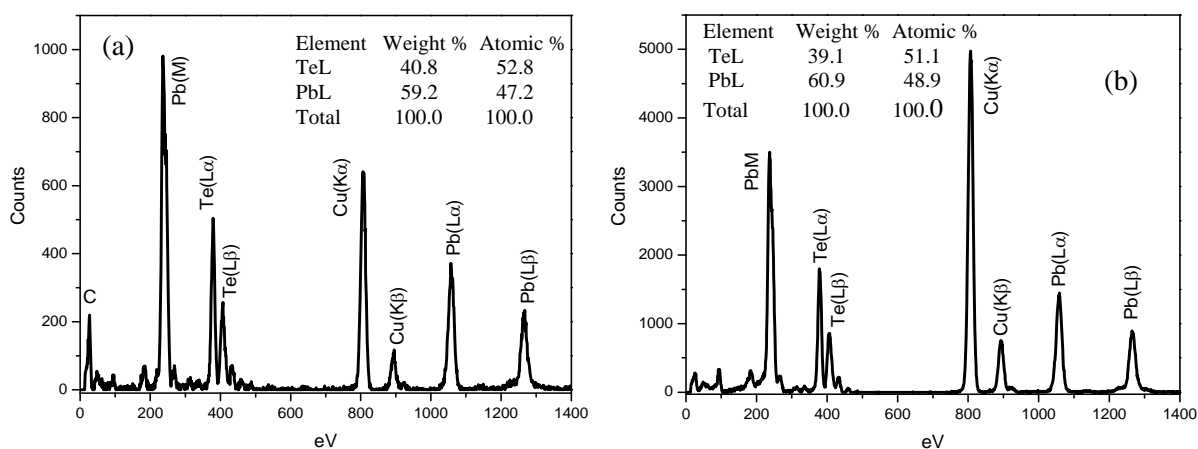

**Fig. S6.** EDS of a) 12 nm PbTe nanoparticles and b) PbTe aerogels prepared from 12 nm particles.

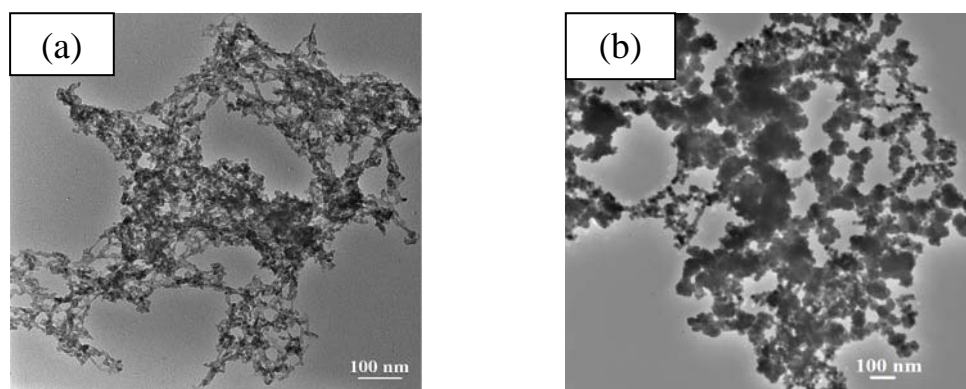

**Fig. S7.** TEM micrographs of aerogel network obtained after addition of 3% H<sub>2</sub>O<sub>2</sub> to achieve a ratio of concentration of a) H<sub>2</sub>O<sub>2</sub>:Pb<sup>2+</sup> = 1: 6 and b) H<sub>2</sub>O<sub>2</sub>: Pb<sup>2+</sup> = 1: 11.

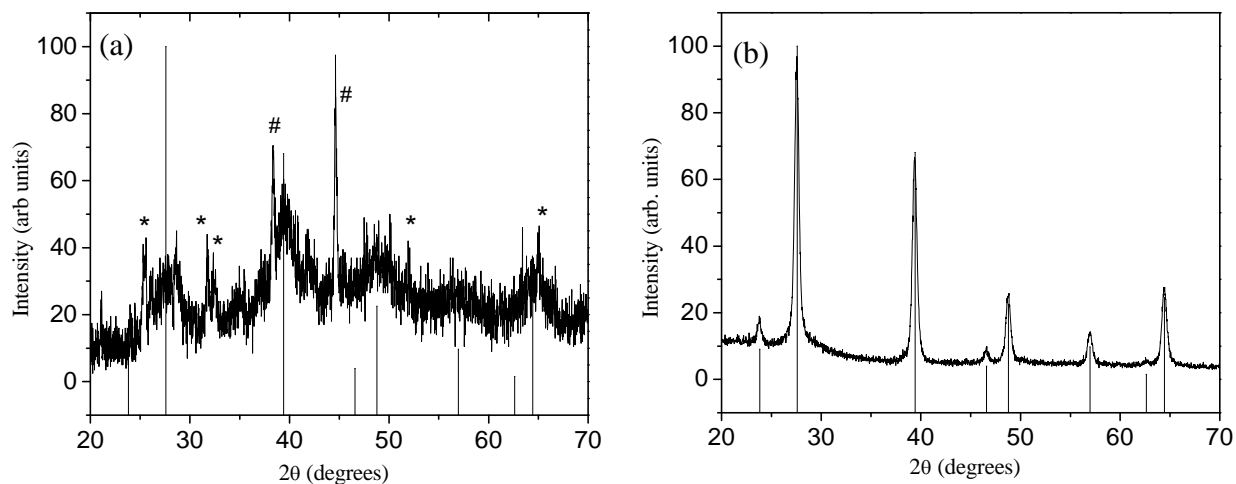

**Fig. S8.** PXRD pattern of PbTe aerogel from addition of 3 % H<sub>2</sub>O<sub>2</sub> to achieve a ratio of concentration of a) H<sub>2</sub>O<sub>2</sub>:Pb<sup>2+</sup> = 1: 6 and b) H<sub>2</sub>O<sub>2</sub>:Pb<sup>2+</sup> = 1:11. The symbols “\*” and “#” denote impurity peaks from Te<sub>2</sub>O<sub>5</sub> and Pb<sub>2</sub>O<sub>3</sub>, respectively. The line diagrams correspond to the ICDD-PDF # 38-1435 of cubic PbTe.
